# Supplementary material for: Hydrodeoxygenation of acetic acid over Ni-promoted Cu-based catalysts: a theoretical mechanism and kinetic study
Source: Royal Society of Chemistry journal article supplement (doi:10.1039/d2cy02097a), 2023-01-01
Supplement: d2cy02097a1.pdf [file d2cy02097a1.pdf]

## Supporting Information

### Hydrodeoxygenation of Acetic Acid over Ni-promoted Cu-based Catalysts: A Theoretical Mechanism and Kinetic Study

Minhua Zhang <sup>a,b,c</sup>, Jingbo Du <sup>a,b,c</sup>, Yifei Chen <sup>a,b,c</sup>\*

<sup>a</sup> Key Laboratory for Green Chemical Technology of Ministry of Education, R&D Center for Petrochemical  
Technology, Tianjin University, Tianjin 300072, China

<sup>b</sup> Zhejiang Institute of Tianjin University, Ningbo, Zhejiang, 315201, China

<sup>c</sup> State Key Laboratory of Engines, Tianjin University, Tianjin 300072, China

\*Corresponding author. Tel.: +86-22-27406119; fax: +86-22-27406119. E-mail address: yfchen@tju.edu.cn.

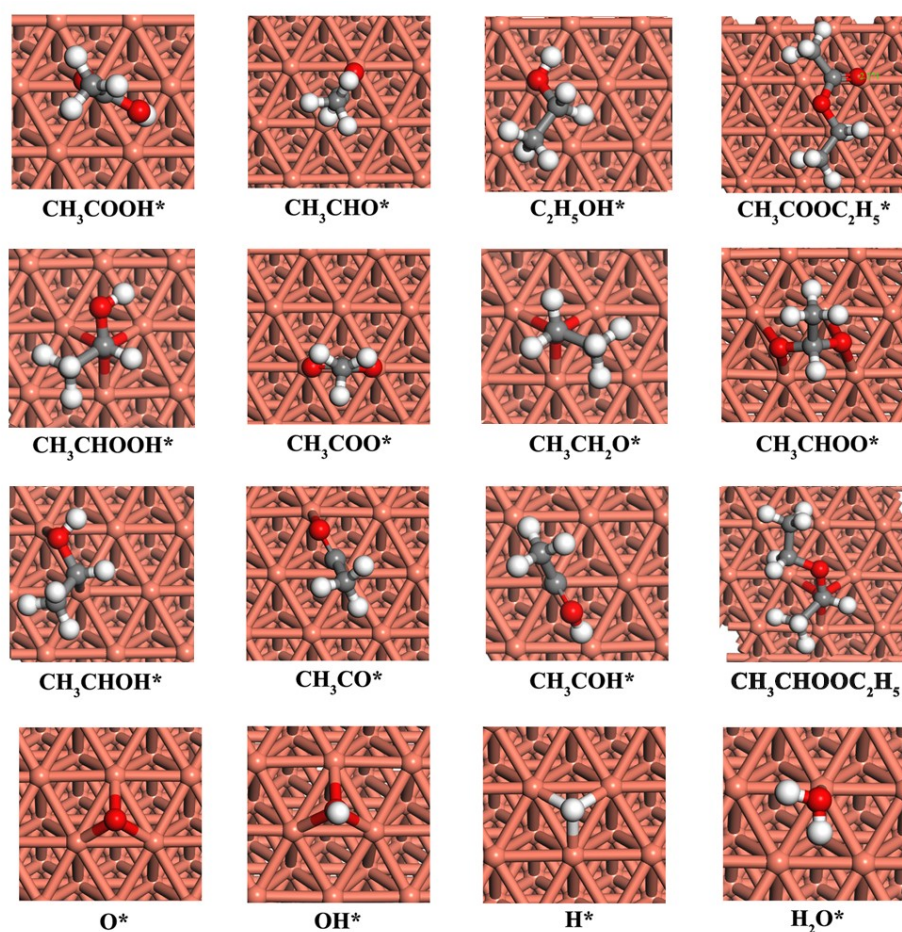

**Figure S1.** The configuration of adsorbates involved in the HDO process of acetic acid on the Cu

(111) surface

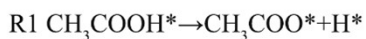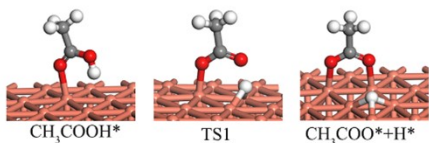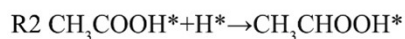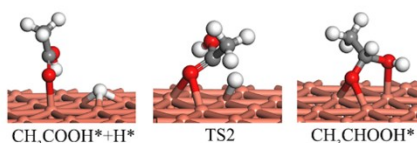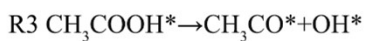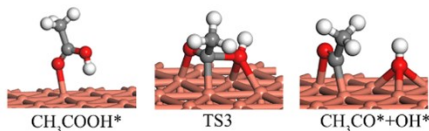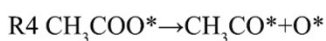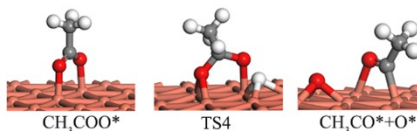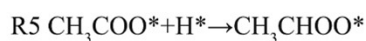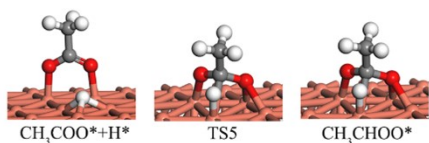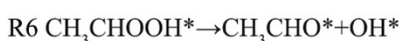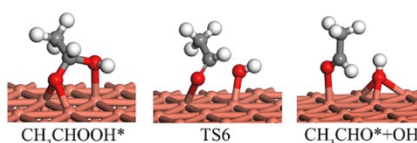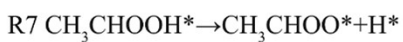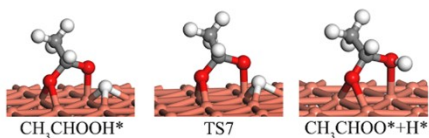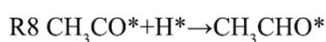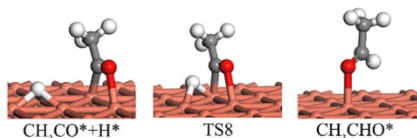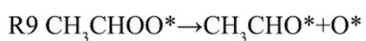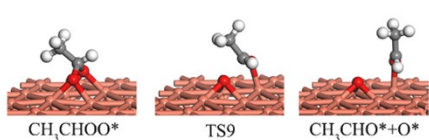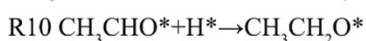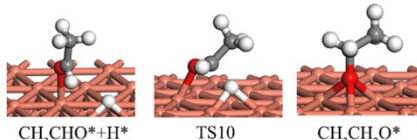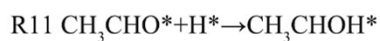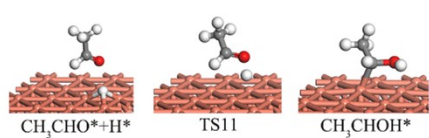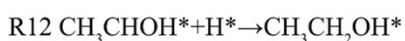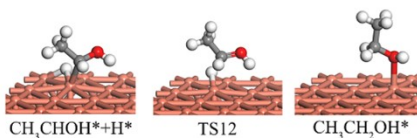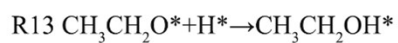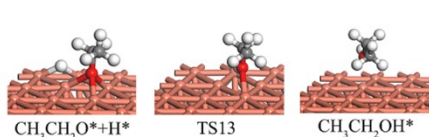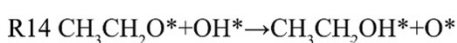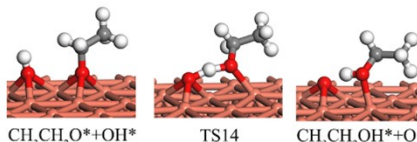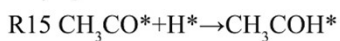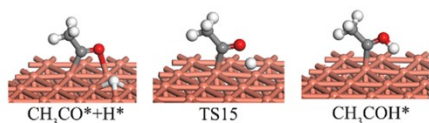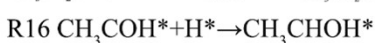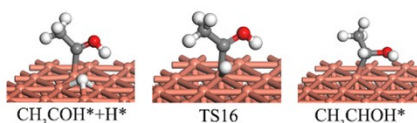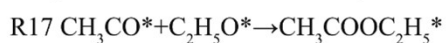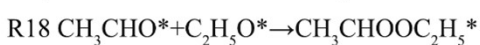

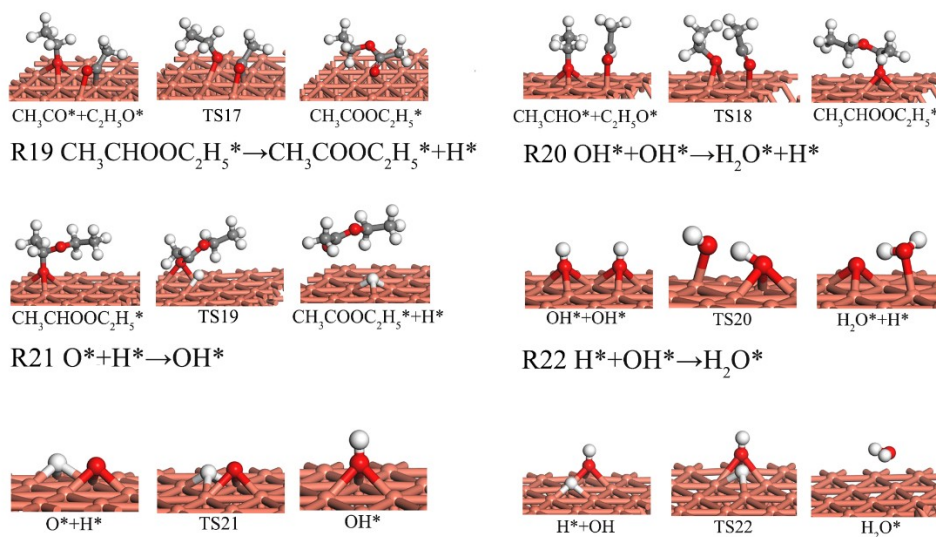

**Figure S2.** The configuration of IS, TS and FS of the each elementary step involved in the conversion of acetic acid on the Cu (111) surface

**Table S1.** The relative stability of the several NiCu(111) surface with and without the existence of the adsorbates on the Ni site. The Ni<sub>sin</sub>Cu, Ni<sub>sin</sub>Cu, Ni<sub>sin</sub>Cu and NiCu-X\* was the same meaning as that in the Figure 1. For every chosen species, adsorbate with highest adsorption energies was defined as the zero point of energy for simplicity.

| Species | Ni <sub>sin</sub> Cu (eV) | Ni <sub>dim</sub> Cu (eV) | Ni <sub>tet</sub> Cu (eV) |
|---------|---------------------------|---------------------------|---------------------------|
| bare    | 0.00                      | +0.02                     | +0.05                     |
| H*      | +0.36                     | +0.19                     | 0.00                      |
| O*      | +0.72                     | +0.38                     | 0.00                      |
| OH*     | +0.32                     | +0.18                     | 0.00                      |

**Table S2.** The elementary reaction and corresponding rate equation involved in the HDO process of acetic acid. There were 4 kinds of sites in the current system. \*, \*\*, \*\*\* and \*\*\*\* represented that the most stable site (Ni<sup>3</sup> site), the secondary stable site (usually Ni<sup>2</sup> site), the site for the adsorbed hydrogen atoms on the nickel and the monometallic Cu site, respectively.

| Elementary Reaction                                                                                                                                                                       | Rates equation                                                                                                                                                                                                                                                 |
|-------------------------------------------------------------------------------------------------------------------------------------------------------------------------------------------|----------------------------------------------------------------------------------------------------------------------------------------------------------------------------------------------------------------------------------------------------------------|
| $\text{RCOOH}^* + \text{****} \rightarrow \text{RCOO}^* + \text{H}^{\text{****}}$                                                                                                         | $r_1 = k_1\theta_{\text{RCOOH}^*}\theta_{\text{****}} - k_{-1}\theta_{\text{RCOO}^*}\theta_{\text{H}^{\text{****}}}$                                                                                                                                           |
| $\text{RCOOH}^* + \text{H}^{\text{****}} \rightarrow \text{RCHOOH}^* + \text{****}$                                                                                                       | $r_2 = k_2\theta_{\text{RCOOH}^*}\theta_{\text{H}^{\text{****}}} - k_{-2}\theta_{\text{RCHOOH}^*}\theta_{\text{****}}$                                                                                                                                         |
| $\text{RCOOH}^* + \text{**} \rightarrow \text{RCO}^* + \text{OH}^{\text{**}}$                                                                                                             | $r_3 = k_3\theta_{\text{RCOOH}^*}\theta_{\text{**}} - k_{-3}\theta_{\text{RCO}^*}\theta_{\text{OH}^{\text{**}}}$                                                                                                                                               |
| $\text{RCO}^* + \text{OH}^{\text{**}} + \text{****} \rightarrow \text{RCO}^* + \text{**} + \text{OH}^{\text{****}}$                                                                       | $r_{31} = k_{31}\theta_{\text{RCO}^*}\theta_{\text{OH}^{\text{**}}}\theta_{\text{****}} - k_{-31}\theta_{\text{RCO}^*}\theta_{\text{**}}\theta_{\text{OH}^{\text{****}}}$                                                                                      |
| $\text{OH}^{\text{****}} + * \rightarrow \text{OH}^* + \text{****}$                                                                                                                       | $r_{32} = k_{32}\theta_{\text{OH}^{\text{****}}}\theta_* - k_{-32}\theta_{\text{OH}^*}\theta_{\text{****}}$                                                                                                                                                    |
| $\text{RCOO}^* + \text{**} \rightarrow \text{RCO}^{\text{**}} + \text{O}^*$                                                                                                               | $r_4 = k_4\theta_{\text{RCOO}^*}\theta_{\text{**}} - k_{-4}\theta_{\text{RCO}^{\text{**}}}\theta_{\text{O}^*}$                                                                                                                                                 |
| $\text{RCO}^{\text{**}} + \text{O}^* + \text{****} \rightarrow \text{RCO}^{\text{****}} + \text{O}^* + \text{**}$                                                                         | $r_{41} = k_{41}\theta_{\text{RCO}^{\text{**}}}\theta_{\text{O}^*}\theta_{\text{****}} - k_{-41}\theta_{\text{RCO}^{\text{****}}}\theta_{\text{O}^*}\theta_{\text{**}}$                                                                                        |
| $\text{RCO}^{\text{****}} + * \rightarrow \text{RCO}^* + \text{****}$                                                                                                                     | $r_{42} = k_{42}\theta_{\text{RCO}^{\text{****}}}\theta_* - k_{-42}\theta_{\text{RCO}^*}\theta_{\text{****}}$                                                                                                                                                  |
| $\text{RCOO}^* + \text{H}^{\text{****}} \rightarrow \text{RCHOO}^* + \text{****}$                                                                                                         | $r_5 = k_5\theta_{\text{RCOO}^*}\theta_{\text{H}^{\text{****}}} - k_{-5}\theta_{\text{RCHOO}^*}\theta_{\text{****}}$                                                                                                                                           |
| $\text{RCHOOH}^* \rightarrow \text{RCHO}(\text{g}) + \text{OH}^*$                                                                                                                         | $r_6 = k_6\theta_{\text{RCHOOH}^*} - k_{-6}P_{\text{RCHO}}/P^0\theta_{\text{OH}^*}$                                                                                                                                                                            |
| $\text{RCHOOH}^* + \text{****} \rightarrow \text{RCHOO}^* + \text{H}^{\text{****}}$                                                                                                       | $r_7 = k_7\theta_{\text{RCHOOH}^*}\theta_{\text{****}} - k_{-7}\theta_{\text{RCHOO}^*}\theta_{\text{H}^{\text{****}}}$                                                                                                                                         |
| $\text{RCO}^* + \text{H}^{\text{****}} \rightarrow \text{RCHO}(\text{g}) + * + \text{****}$                                                                                               | $r_8 = k_8\theta_{\text{RCO}^*}\theta_{\text{H}^{\text{****}}} - k_{-8}\theta_*\theta_{\text{****}}P_{\text{RCHO}}/P^0$                                                                                                                                        |
| $\text{RCO}^{\text{**}} + \text{O}^* + \text{H}^{\text{****}} \rightarrow \text{RCHO}(\text{g}) + \text{O}^* + \text{**} + \text{****}$                                                   | $r_{81} = k_{81}\theta_{\text{RCO}^{\text{**}}}\theta_{\text{O}^*}\theta_{\text{H}^{\text{****}}} - k_{-81}\theta_{\text{O}^*}\theta_{\text{****}}P_{\text{RCHO}}/P^0$                                                                                         |
| $\text{RCO}^* + \text{OH}^{\text{**}} + \text{H}^{\text{****}} \rightarrow \text{RCHO}(\text{g}) + \text{OH}^* + \text{**} + \text{****}$                                                 | $r_{82} = k_{82}\theta_{\text{RCO}^*}\theta_{\text{OH}^{\text{**}}}\theta_{\text{H}^{\text{****}}} - k_{-82}\theta_{\text{OH}^*}\theta_{\text{****}}P_{\text{RCHO}}/P^0$                                                                                       |
| $\text{RCHOO}^* \rightarrow \text{RCHO}(\text{g}) + \text{O}^*$                                                                                                                           | $r_9 = k_9\theta_{\text{RCHOO}^*} - k_{-9}\theta_{\text{O}^*}P_{\text{RCHO}}/P^0$                                                                                                                                                                              |
| $\text{RCHO}(\text{g}) + \text{H}^{\text{****}} + * \rightarrow \text{RCH}_2\text{O}^* + \text{****}$                                                                                     | $r_{10} = k_{10}\theta_{\text{H}^{\text{****}}}\theta_*P_{\text{RCHO}}/P^0 - k_{-10}\theta_{\text{RCH}_2\text{O}^*}\theta_{\text{****}}$                                                                                                                       |
| $\text{RCHO}(\text{g}) + \text{O}^* + \text{**} + \text{H}^{\text{****}} \rightarrow \text{O}^* + \text{RCH}_2\text{O}^{\text{**}} + \text{****}$                                         | $r_{101} = k_{101}\theta_{\text{O}^*}\theta_{\text{**}}\theta_{\text{H}^{\text{****}}}P_{\text{RCHO}}/P^0 - k_{-101}\theta_{\text{RCH}_2\text{O}^{\text{**}}}\theta_{\text{O}^*}\theta_{\text{****}}$                                                          |
| $\text{RCHO}(\text{g}) + \text{OH}^* + \text{**} + \text{H}^{\text{****}} \rightarrow \text{OH}^* + \text{RCH}_2\text{O}^{\text{**}} + \text{****}$                                       | $r_{102} = k_{102}P_{\text{RCHO}}/P^0\theta_{\text{OH}^*}\theta_{\text{**}}\theta_{\text{H}^{\text{****}}} - k_{-102}\theta_{\text{RCH}_2\text{O}^{\text{**}}}\theta_{\text{OH}^*}\theta_{\text{****}}$                                                        |
| $\text{RCH}_2\text{O}^{\text{**}} + \text{O}^* + \text{****} \rightarrow \text{RCH}_2\text{O}^{\text{****}} + \text{O}^* + \text{**}$                                                     | $r_{103} = k_{103}\theta_{\text{RCH}_2\text{O}^{\text{**}}}\theta_{\text{O}^*}\theta_{\text{****}} - k_{-103}\theta_{\text{RCH}_2\text{O}^{\text{****}}}\theta_{\text{O}^*}\theta_{\text{**}}$                                                                 |
| $\text{RCH}_2\text{O}^{\text{**}} + \text{OH}^* + \text{****} \rightarrow \text{RCH}_2\text{O}^{\text{****}} + \text{OH}^* + \text{**}$                                                   | $r_{104} = k_{104}\theta_{\text{RCH}_2\text{O}^{\text{**}}}\theta_{\text{OH}^*}\theta_{\text{****}} - k_{-104}\theta_{\text{RCH}_2\text{O}^{\text{****}}}\theta_{\text{OH}^*}\theta_{\text{**}}$                                                               |
| $\text{RCH}_2\text{O}^{\text{****}} + * \rightarrow \text{RCH}_2\text{O}^* + \text{****}$                                                                                                 | $r_{105} = k_{105}\theta_{\text{RCH}_2\text{O}^{\text{****}}}\theta_* - k_{-105}\theta_{\text{RCH}_2\text{O}^*}\theta_{\text{****}}$                                                                                                                           |
| $\text{RCH}_2\text{O}^{\text{****}} + \text{RCO}^* + \text{**} \rightarrow \text{RCH}_2\text{O}^{\text{**}} + \text{RCO}^* + \text{****}$                                                 | $r_{106} = k_{106}\theta_{\text{RCH}_2\text{O}^{\text{****}}}\theta_{\text{RCO}^*}\theta_{\text{**}} - k_{-106}\theta_{\text{RCH}_2\text{O}^{\text{**}}}\theta_{\text{RCO}^*}\theta_{\text{****}}$                                                             |
| $\text{RCH}_2\text{O}^* + \text{RCO}^{\text{****}} + \text{**} \rightarrow \text{RCH}_2\text{O}^* + \text{RCO}^{\text{**}} + \text{****}$                                                 | $r_{107} = k_{107}\theta_{\text{RCO}^{\text{****}}}\theta_{\text{RCH}_2\text{O}^*}\theta_{\text{**}} - k_{-107}\theta_{\text{RCO}^{\text{**}}}\theta_{\text{RCH}_2\text{O}^*}\theta_{\text{****}}$                                                             |
| $\text{RCH}_2\text{O}^{\text{****}} + \text{RCO}^* + \text{OH}^{\text{**}} + \text{**} \rightarrow \text{RCH}_2\text{O}^{\text{**}} + \text{RCO}^* + \text{OH}^{\text{**}} + \text{****}$ | $r_{108} = k_{108}\theta_{\text{RCH}_2\text{O}^{\text{****}}}\theta_{\text{RCO}^*}\theta_{\text{OH}^{\text{**}}}\theta_{\text{**}} - k_{-108}\theta_{\text{OH}^{\text{**}}}\theta_{\text{RCH}_2\text{O}^{\text{**}}}\theta_{\text{RCO}^*}\theta_{\text{****}}$ |
| $\text{RCHO}(\text{g}) + \text{H}^{\text{****}} + * \rightarrow \text{RCHOH}^* + \text{****}$                                                                                             | $r_{11} = k_{11}\theta_{\text{H}^{\text{****}}}\theta_*P_{\text{RCHO}}/P^0 - k_{-11}\theta_{\text{RCHOH}^*}\theta_{\text{****}}$                                                                                                                               |
| $\text{RCHO}(\text{g}) + \text{O}^* + \text{**} + \text{H}^{\text{****}} \rightarrow \text{RCHOH}^{\text{**}} + \text{O}^* + \text{****}$                                                 | $r_{111} = k_{111}\theta_{\text{O}^*}\theta_{\text{**}}\theta_{\text{H}^{\text{****}}}P_{\text{RCHO}}/P^0 - k_{-111}\theta_{\text{RCHOH}^{\text{**}}}\theta_{\text{O}^*}\theta_{\text{****}}$                                                                  |
| $\text{RCHO}(\text{g}) + \text{OH}^* + \text{**} + \text{H}^{\text{****}} \rightarrow \text{RCHOH}^* + \text{OH}^{\text{**}} + \text{****}$                                               | $r_{112} = k_{112}\theta_{\text{OH}^*}\theta_{\text{**}}\theta_{\text{H}^{\text{****}}}P_{\text{RCHO}}/P^0 - k_{-112}\theta_{\text{RCHOH}^*}\theta_{\text{OH}^{\text{**}}}\theta_{\text{****}}$                                                                |
| $\text{RCHOH}^* + \text{H}^{\text{****}} \rightarrow \text{RCH}_2\text{OH}(\text{g}) + * + \text{****}$                                                                                   | $r_{12} = k_{12}\theta_{\text{RCHOH}^*}\theta_{\text{H}^{\text{****}}} - k_{-12}\theta_*\theta_{\text{****}}P_{\text{RCH}_2\text{OH}}/P^0$                                                                                                                     |
| $\text{RCHOH}^{\text{**}} + \text{O}^* + \text{H}^{\text{****}} \rightarrow \text{RCH}_2\text{OH}(\text{g}) + \text{O}^* + \text{**} + \text{****}$                                       | $r_{121} = k_{121}\theta_{\text{RCHOH}^{\text{**}}}\theta_{\text{O}^*}\theta_{\text{H}^{\text{****}}} - k_{-121}\theta_{\text{O}^*}\theta_{\text{****}}P_{\text{RCH}_2\text{OH}}/P^0$                                                                          |
| $\text{RCHOH}^* + \text{OH}^{\text{**}} + \text{H}^{\text{****}} \rightarrow \text{RCH}_2\text{OH}(\text{g}) + \text{OH}^* + \text{**} + \text{****}$                                     | $r_{122} = k_{122}\theta_{\text{RCHOH}^*}\theta_{\text{OH}^{\text{**}}}\theta_{\text{H}^{\text{****}}} - k_{-122}\theta_{\text{OH}^*}\theta_{\text{****}}P_{\text{RCH}_2\text{OH}}/P^0$                                                                        |
| $\text{RCH}_2\text{O}^* + \text{H}^{\text{****}} \rightarrow \text{RCH}_2\text{OH}(\text{g}) + * + \text{****}$                                                                           | $r_{13} = k_{13}\theta_{\text{RCH}_2\text{O}^*}\theta_{\text{H}^{\text{****}}} - k_{-13}\theta_*\theta_{\text{****}}P_{\text{RCH}_2\text{OH}}/P^0$                                                                                                             |

|                                                                                                                                          |                                                                                                                                                                                                           |
|------------------------------------------------------------------------------------------------------------------------------------------|-----------------------------------------------------------------------------------------------------------------------------------------------------------------------------------------------------------|
| $\text{RCH}_2\text{O}^{**} + \text{O}^* + \text{H}^{***} \rightarrow \text{RCH}_2\text{OH}(\text{g}) + \text{O}^* + ** + ****$           | $r_{131} = k_{131}\theta_{\text{RCH}_2\text{O}^{**}}\theta_{\text{O}^*}\theta_{\text{H}^{***}} - k_{131}\theta_{\text{O}^*}\theta_{**}\theta_{****}\text{P}_{\text{RCH}_2\text{OH}}/\text{P}^0$           |
| $\text{RCH}_2\text{O}^{**} + \text{OH}^* + \text{H}^{***} \rightarrow \text{RCH}_2\text{OH}(\text{g}) + \text{OH}^* + ** + ****$         | $r_{132} = k_{132}\theta_{\text{RCH}_2\text{O}^{**}}\theta_{\text{OH}^*}\theta_{\text{H}^{***}} - k_{132}\theta_{\text{OH}^*}\theta_{**}\theta_{****}\text{P}_{\text{RCH}_2\text{OH}}/\text{P}^0$         |
| $\text{RCH}_2\text{O}^{**} + \text{OH}^* \rightarrow \text{RCH}_2\text{OH}(\text{g}) + \text{O}^* + **$                                  | $r_{14} = k_{14}\theta_{\text{RCH}_2\text{O}^{**}}\theta_{\text{OH}^*} - k_{14}\theta_{\text{O}^*}\theta_{**}\text{P}_{\text{RCH}_2\text{OH}}/\text{P}^0$                                                 |
| $\text{RCO}^* + \text{H}^{***} \rightarrow \text{RCOH}^* + ****$                                                                         | $r_{15} = k_{15}\theta_{\text{RCO}^*}\theta_{\text{H}^{***}} - k_{15}\theta_{\text{RCOH}^*}\theta_{****}$                                                                                                 |
| $\text{RCO}^{**} + \text{O}^* + \text{H}^{***} \rightarrow \text{RCOH}^{**} + \text{O}^* + ****$                                         | $r_{151} = k_{151}\theta_{\text{RCO}^{**}}\theta_{\text{O}^*}\theta_{\text{H}^{***}} - k_{151}\theta_{\text{RCOH}^{**}}\theta_{\text{O}^*}\theta_{****}$                                                  |
| $\text{RCO}^* + \text{OH}^{**} + \text{H}^{***} \rightarrow \text{RCOH}^* + \text{OH}^{**} + ****$                                       | $r_{152} = k_{152}\theta_{\text{RCO}^*}\theta_{\text{OH}^{**}}\theta_{\text{H}^{***}} - k_{152}\theta_{\text{RCOH}^*}\theta_{\text{OH}^{**}}\theta_{****}$                                                |
| $\text{RCOH}^* + \text{H}^{***} \rightarrow \text{RCHOH}^* + ****$                                                                       | $r_{16} = k_{16}\theta_{\text{RCOH}^*}\theta_{\text{H}^{***}} - k_{16}\theta_{\text{RCHOH}^*}\theta_{****}$                                                                                               |
| $\text{RCOH}^{**} + \text{O}^* + \text{H}^{***} \rightarrow \text{RCHOH}^{**} + \text{O}^* + ****$                                       | $r_{161} = k_{161}\theta_{\text{RCOH}^{**}}\theta_{\text{O}^*}\theta_{\text{H}^{***}} - k_{161}\theta_{\text{RCHOH}^{**}}\theta_{\text{O}^*}\theta_{****}$                                                |
| $\text{RCOH}^* + \text{OH}^{**} + \text{H}^{***} \rightarrow \text{RCHOH}^* + \text{OH}^{**} + ****$                                     | $r_{162} = k_{162}\theta_{\text{RCOH}^*}\theta_{\text{OH}^{**}}\theta_{\text{H}^{***}} - k_{162}\theta_{\text{RCHOH}^*}\theta_{\text{OH}^{**}}\theta_{****}$                                              |
| $\text{RCO}^{**} + \text{RCH}_2\text{O}^* \rightarrow \text{RCOOC}_2\text{H}_5(\text{g}) + * + **$                                       | $r_{170} = k_{170}*\theta_{\text{RCO}^{**}}\theta_{\text{RCH}_2\text{O}^*} - k_{170}\text{P}_{\text{RCOOC}_2\text{H}_5}/\text{P}^0\theta_{**}$                                                            |
| $\text{RCO}^* + \text{RCH}_2\text{O}^{**} \rightarrow \text{RCOOC}_2\text{H}_5(\text{g}) + * + **$                                       | $r_{17} = k_{17}\theta_{\text{RCO}^*}\theta_{\text{RCH}_2\text{O}^{**}} - k_{17}\theta_{**}\theta_{**}\text{P}_{\text{RCOOC}_2\text{H}_5}/\text{P}^0$                                                     |
| $\text{RCO}^{**} + \text{O}^* + \text{RCH}_2\text{O}^{****} \rightarrow \text{RCOOC}_2\text{H}_5(\text{g}) + \text{O}^* + ** + ****$     | $r_{171} = k_{171}\theta_{\text{RCO}^{**}}\theta_{\text{O}^*}\theta_{\text{RCH}_2\text{O}^{****}} - k_{171}\theta_{\text{O}^*}\theta_{**}\theta_{****}\text{P}_{\text{RCOOC}_2\text{H}_5}/\text{P}^0$     |
| $\text{RCH}_2\text{O}^{**} + \text{RCO}^* + \text{OH}^{**} \rightarrow \text{RCOOC}_2\text{H}_5(\text{g}) + \text{OH}^* + 2**$           | $r_{172} = k_{172}\theta_{\text{OH}^{**}}\theta_{\text{RCH}_2\text{O}^{**}} + \theta_{\text{RCO}^*} - k_{172}\theta_{\text{OH}^*}\theta_{**}2\text{P}_{\text{RCOOC}_2\text{H}_5}/\text{P}^0$              |
| $\text{RCHO}(\text{g}) + \text{RCH}_2\text{O}^* \rightarrow \text{RCHOOC}_2\text{H}_5^*$                                                 | $r_{180} = k_{180}\theta_{\text{RCH}_2\text{O}^*}\text{P}_{\text{RCHO}}/\text{P}^0 - k_{180}\theta_{\text{RCHOOC}_2\text{H}_5^*}$                                                                         |
| $\text{RCHO}(\text{g}) + \text{RCH}_2\text{O}^{**} + \text{O}^* \rightarrow \text{RCHOOC}_2\text{H}_5^{**} + \text{O}^*$                 | $r_{181} = k_{181}\theta_{\text{RCH}_2\text{O}^{**}}\theta_{\text{O}^*}\text{P}_{\text{RCHO}}/\text{P}^0 - k_{181}\theta_{\text{RCHOOC}_2\text{H}_5^{**}} + \theta_{\text{O}^*}$                          |
| $\text{RCHO}(\text{g}) + \text{RCH}_2\text{O}^{**} + \text{OH}^* \rightarrow \text{RCHOOC}_2\text{H}_5^{**} + \text{OH}^*$               | $r_{182} = k_{182}\theta_{\text{RCH}_2\text{O}^{**}}\theta_{\text{OH}^*}\text{P}_{\text{RCHO}}/\text{P}^0 - k_{182}\theta_{\text{RCHOOC}_2\text{H}_5^{**}} + \theta_{\text{OH}^*}$                        |
| $\text{RCHOOC}_2\text{H}_5^{**} + \text{O}^* + **** \rightarrow \text{RCHOOC}_2\text{H}_5^{****} + \text{O}^* + **$                      | $r_{183} = k_{183}\theta_{\text{RCHOOC}_2\text{H}_5^{**}}\theta_{\text{O}^*}\theta_{****} - k_{183}\theta_{\text{RCHOOC}_2\text{H}_5^{****}}\theta_{\text{O}^*}\theta_{**}$                               |
| $\text{RCHOOC}_2\text{H}_5^{**} + \text{OH}^* + **** \rightarrow \text{RCHOOC}_2\text{H}_5^{****} + \text{OH}^* + **$                    | $r_{184} = k_{184}\theta_{\text{RCHOOC}_2\text{H}_5^{**}}\theta_{\text{OH}^*}\theta_{****} - k_{184}\theta_{\text{RCHOOC}_2\text{H}_5^{****}}\theta_{\text{OH}^*}\theta_{**}$                             |
| $\text{RCHOOC}_2\text{H}_5^{****} + * \rightarrow \text{RCHOOC}_2\text{H}_5^* + ****$                                                    | $r_{185} = k_{185}\theta_{\text{RCHOOC}_2\text{H}_5^{****}}\theta_* - k_{185}\theta_{\text{RCHOOC}_2\text{H}_5^*}\theta_{****}$                                                                           |
| $\text{RCHOOC}_2\text{H}_5^* + **** \rightarrow \text{CH}_3\text{COOC}_2\text{H}_5(\text{g}) + * + \text{H}^{***}$                       | $r_{19} = k_{19}\theta_{\text{RCHOOC}_2\text{H}_5^*}\theta_{****} - k_{19}\theta_*\theta_{\text{H}^{***}}\text{P}_{\text{RCOOC}_2\text{H}_5}/\text{P}^0$                                                  |
| $\text{RCHOOC}_2\text{H}_5^{**} + \text{O}^* + **** \rightarrow \text{RCOOC}_2\text{H}_5(\text{g}) + \text{O}^* + ** + \text{H}^{***}$   | $r_{191} = k_{191}\theta_{\text{RCHOOC}_2\text{H}_5^{**}}\theta_{\text{O}^*}\theta_{****} - k_{191}\theta_{\text{O}^*}\theta_{**}\theta_{\text{H}^{***}}\text{P}_{\text{RCOOC}_2\text{H}_5}/\text{P}^0$   |
| $\text{RCHOOC}_2\text{H}_5^{**} + \text{OH}^* + **** \rightarrow \text{RCOOC}_2\text{H}_5(\text{g}) + \text{OH}^* + ** + \text{H}^{***}$ | $r_{192} = k_{192}\theta_{\text{RCHOOC}_2\text{H}_5^{**}}\theta_{\text{OH}^*}\theta_{****} - k_{192}\theta_{\text{OH}^*}\theta_{**}\theta_{\text{H}^{***}}\text{P}_{\text{RCOOC}_2\text{H}_5}/\text{P}^0$ |
| $2\text{OH}^* \rightarrow \text{H}_2\text{O}(\text{g}) + \text{O}^* + *$                                                                 | $r_{20} = k_{20}\theta_2\text{OH}^* - k_{20}\theta_{\text{O}^*}\theta_*\text{P}_{\text{H}_2\text{O}}/\text{P}^0$                                                                                          |
| $\text{O}^* + \text{H}^{***} \rightarrow \text{OH}^* + ****$                                                                             | $r_{21} = k_{21}\theta_{\text{O}^*}\theta_{\text{H}^{***}} - k_{21}\theta_{\text{OH}^*}\theta_{****}$                                                                                                     |
| $\text{OH}^* + \text{H}^{***} \rightarrow \text{H}_2\text{O}(\text{g}) + * + ****$                                                       | $r_{22} = k_{22}\theta_{\text{OH}^*}\theta_{\text{H}^{***}} - k_{22}\theta_*\theta_{****}\text{P}_{\text{H}_2\text{O}}/\text{P}^0$                                                                        |
| $\text{RCOOH}(\text{g}) + * \rightarrow \text{RCOOH}^*$                                                                                  | $r_{23} = k_{23}\theta_*\text{P}_{\text{RCOOH}}/\text{P}^0 - k_{23}\theta_{\text{RCOOH}^*}$                                                                                                               |
| $\text{H}_2(\text{g}) + 2** \rightarrow 2\text{H}^{***}$                                                                                 | $r_{24} = k_{24}\theta_2 **\text{P}_{\text{H}_2}/\text{P}^0 - k_{24}\theta_2\text{H}^{***}$                                                                                                               |
| $\text{RCOOH}^{****} + **** \rightarrow \text{RCOO}^{****} + \text{H}^{****}$                                                            | $r_{01} = k_{01}\theta_{\text{RCOOH}^{****}}\theta_{****} - k_{01}\theta_{\text{RCOO}^{****}}\theta_{\text{H}^{****}}$                                                                                    |
| $\text{RCOOH}^{****} + \text{H}^{****} \rightarrow \text{RCHOH}^{****} + ****$                                                           | $r_{02} = k_{02}\theta_{\text{RCOOH}^{****}}\theta_{\text{H}^{****}} - k_{02}\theta_{\text{RCHOH}^{****}}\theta_{****}$                                                                                   |
| $\text{RCHOH}^{****} \rightarrow \text{RCHO}(\text{g}) + \text{OH}^{****}$                                                               | $r_{03} = k_{03}\theta_{\text{RCHOH}^{****}} - k_{03}\theta_{\text{OH}^{****}}\text{P}_{\text{RCHO}}/\text{P}^0$                                                                                          |
| $\text{RCO}^{****} + \text{H}^{****} \rightarrow \text{RCHO}(\text{g}) + 2****$                                                          | $r_{04} = k_{04}\theta_{\text{RCO}^{****}}\theta_{\text{H}^{****}} - k_{04}\theta_{****}\text{P}_{\text{RCHO}}/\text{P}^0$                                                                                |
| $\text{RCHO}(\text{g}) + \text{H}^{****} \rightarrow \text{RCH}_2\text{O}^{****}$                                                        | $r_{05} = k_{05}\theta_{\text{H}^{****}}\text{P}_{\text{RCHO}}/\text{P}^0 - k_{05}\theta_{\text{RCH}_2\text{O}^{****}}$                                                                                   |
| $\text{RCH}_2\text{O}^{****} + \text{H}^{****} \rightarrow \text{RCH}_2\text{OH}(\text{g}) + 2****$                                      | $r_{06} = k_{06}\theta_{\text{RCH}_2\text{O}^{****}}\theta_{\text{H}^{****}} - k_{06}\theta_{****}\text{P}_{\text{RCH}_2\text{OH}}/\text{P}^0$                                                            |
| $\text{RCO}^{****} + \text{RCH}_2\text{O}^{****} \rightarrow \text{RCOOC}_2\text{H}_5(\text{g}) + 2****$                                 | $r_{07} = k_{07}\theta_{\text{RCO}^{****}}\theta_{\text{RCH}_2\text{O}^{****}} - k_{07}\theta_2 **\text{P}_{\text{RCOOC}_2\text{H}_5}/\text{P}^0$                                                         |
| $\text{RCHO}(\text{g}) + \text{RCH}_2\text{O}^{****} \rightarrow \text{RCHOOC}_2\text{H}_5^{****}$                                       | $r_{08} = k_{08}\theta_{\text{RCH}_2\text{O}^{****}}\text{P}_{\text{RCHO}}/\text{P}^0 - k_{08}\theta_{\text{RCHOOC}_2\text{H}_5^{****}}$                                                                  |
| $\text{RCHOOC}_2\text{H}_5^{****} \rightarrow \text{RCOOC}_2\text{H}_5(\text{g}) + \text{H}^{****}$                                      | $r_{09} = k_{09}\theta_{\text{RCHOOC}_2\text{H}_5^{****}} - k_{09}\theta_{\text{H}^{****}}\text{P}_{\text{RCOOC}_2\text{H}_5}/\text{P}^0$                                                                 |
| $\text{OH}^{****} + \text{H}^{****} \rightarrow \text{H}_2\text{O}(\text{g}) + 2****$                                                    | $r_{010} = k_{010}\theta_{\text{OH}^{****}}\theta_{\text{H}^{****}} - k_{010}\theta_2 **\text{P}_{\text{H}_2\text{O}}/\text{P}^0$                                                                         |
| $\text{RCOOH}(\text{g}) + **** \rightarrow \text{RCOOH}^{****}$                                                                          | $r_{011} = k_{011}\theta_{****}\text{P}_{\text{RCOOH}}/\text{P}^0 - k_{011}\theta_{\text{RCOOH}^{****}}$                                                                                                  |
| $\text{H}_2(\text{g}) + 2**** \rightarrow 2\text{H}^{****}$                                                                              | $r_{012} = k_{012}\theta_2 **\text{P}_{\text{H}_2}/\text{P}^0 - k_{012}\theta_2\text{H}^{****}$                                                                                                           |

**Table S3.** The barrier, reaction energies in Gibbs free energy and corresponding rates of every elementary reaction involved in the HDO process of acetic acid. The barrier of the migration of species between different sites was set as big as the reaction energies in the endothermic reaction and zero in exothermic reaction, respectively. The relevant energetic values of the R01 ~ R012 step occurred on the Cu site was assumed the same as that on the Cu (111) surface.

| Elementary Reaction                                                                                     | Ga (eV) | $\Delta G$ (eV) | Rates (s <sup>-1</sup> ) |
|---------------------------------------------------------------------------------------------------------|---------|-----------------|--------------------------|
| R1: RCOOH* + *** $\rightarrow$ RCOO* + H***                                                             | 0.20    | -0.50           | 1.23E+00                 |
| R2: RCOOH* + H*** $\rightarrow$ RCHOOH* + ***                                                           | 0.97    | 0.49            | 4.01E-02                 |
| R3: RCOOH* + ** $\rightarrow$ RCO* + OH**                                                               | 0.77    | 0.03            | 9.18E-01                 |
| R31: RCO* + OH** + **** $\rightarrow$ RCO* + ** + OH****                                                | 0.00    | -0.03           | 9.10E-01                 |
| R32: OH**** + * $\rightarrow$ OH* + ****                                                                | 0.00    | -0.41           | -1.24E+00                |
| R4: RCOO* + ** $\rightarrow$ RCO** + O*                                                                 | 0.88    | 0.44            | 1.14E+00                 |
| R41: RCO** + O* + **** $\rightarrow$ RCO**** + O* + **                                                  | 0.52    | 0.52            | 1.14E+00                 |
| R42: RCO**** + * $\rightarrow$ RCO* + ****                                                              | 0.00    | -1.16           | 9.58E-01                 |
| R5: RCOO* + H*** $\rightarrow$ RCHOO* + ***                                                             | 1.21    | 0.99            | 8.18E-02                 |
| R6: RCHOOH* $\rightarrow$ RCHO (g) + OH*                                                                | 0.55    | -0.46           | 4.01E-02                 |
| R7: RCHOOH* + *** $\rightarrow$ RCHOO* + H***                                                           | 0.67    | 0.00            | -2.52E-05                |
| R8: RCO* + H*** $\rightarrow$ RCHO (g) + * + ***                                                        | 0.67    | 0.44            | 1.86E+00                 |
| R81: RCO** + O* + H*** $\rightarrow$ RCHO (g) + O* + ** + ***                                           | 0.78    | -0.20           | 1.28E-03                 |
| R82: RCO* + OH** + H*** $\rightarrow$ RCHO (g) + OH* + ** + ***                                         | 0.54    | 0.00            | 7.91E-03                 |
| R9: RCHOO* $\rightarrow$ RCHO (g) + O*                                                                  | 0.26    | -0.75           | 8.18E-02                 |
| R10: RCHO (g) + H*** + * $\rightarrow$ RCH <sub>2</sub> O* + ***                                        | 0.64    | 0.03            | -2.26E+01                |
| R101: RCHO (g) + O* + ** + H*** $\rightarrow$ O* + RCH <sub>2</sub> O** + ***                           | 1.21    | 0.53            | -3.80E-05                |
| R102: RCHO (g) + OH* + ** + H*** $\rightarrow$ OH* + RCH <sub>2</sub> O** + ***                         | 0.99    | 0.50            | -9.05E-05                |
| R103: RCH <sub>2</sub> O** + O* + **** $\rightarrow$ RCH <sub>2</sub> O**** + O* + **                   | 0.06    | 0.06            | -1.01E-04                |
| R104: RCH <sub>2</sub> O** + OH* + **** $\rightarrow$ RCH <sub>2</sub> O**** + OH* + **                 | 0.04    | 0.04            | -9.51E-01                |
| R105: RCH <sub>2</sub> O**** + * $\rightarrow$ RCH <sub>2</sub> O* + ****                               | 0.00    | -0.56           | 2.27E+01                 |
| R106: RCH <sub>2</sub> O**** + RCO* + ** $\rightarrow$ RCH <sub>2</sub> O** + RCO* + ****               | 0.00    | -0.02           | 3.24E-02                 |
| R107: RCH <sub>2</sub> O** + RCO**** + ** $\rightarrow$ RCH <sub>2</sub> O* + RCO** + ****              | 0.00    | -0.38           | 3.94E-02                 |
| R108: RCH <sub>2</sub> O**** + RCO* + OH** + ** $\rightarrow$ RCH <sub>2</sub> O** + RCO* + OH** + **** | 0.16    | 0.16            | -2.21E-02                |
| R11: RCHO (g) + H*** + * $\rightarrow$ RCHOH* + ***                                                     | 1.16    | 0.71            | 5.45E-04                 |
| R111: RCHO (g) + O* + ** + H*** $\rightarrow$ RCHOH** + O* + ***                                        | 1.75    | 1.33            | -3.78E-05                |
| R112: RCHO(g) + OH* + ** + H*** $\rightarrow$ RCHOH* + OH** + ***                                       | 1.48    | 1.00            | 4.94E-09                 |
| R12: RCHOH* + H*** $\rightarrow$ RCH <sub>2</sub> OH(g) + * + ***                                       | 0.36    | -0.43           | 4.86E-04                 |
| R121: RCHOH** + O* + H*** $\rightarrow$ RCH <sub>2</sub> OH(g) + O* + ** + ***                          | 0.89    | -0.25           | -1.06E-05                |

|                                                                                                                                                                                |      |       |           |
|--------------------------------------------------------------------------------------------------------------------------------------------------------------------------------|------|-------|-----------|
| R122: $\text{RCHOH}^* + \text{OH}^{**} + \text{H}^{***} \rightarrow \text{RCH}_2\text{OH}(\text{g}) + \text{OH}^* + ** + ***$                                                  | 0.31 | -0.74 | -1.63E-06 |
| R13: $\text{RCH}_2\text{O}^* + \text{H}^{***} \rightarrow \text{RCH}_2\text{OH}(\text{g}) + * + ***$                                                                           | 1.15 | 0.25  | 7.00E-02  |
| R131: $\text{RCH}_2\text{O}^{**} + \text{O}^* + \text{H}^{***} \rightarrow \text{RCH}_2\text{OH}(\text{g}) + \text{O}^* + ** + ***$                                            | 0.89 | -0.19 | 6.61E-05  |
| R132: $\text{RCH}_2\text{O}^{**} + \text{OH}^* + \text{H}^{***} \rightarrow \text{RCH}_2\text{OH}(\text{g}) + \text{OH}^* + ** + ***$                                          | 0.94 | -0.22 | 1.73E-06  |
| R14: $\text{RCH}_2\text{O}^{**} + \text{OH}^* \rightarrow \text{RCH}_2\text{OH}(\text{g}) + \text{O}^* + **$                                                                   | 0.26 | -0.50 | 9.51E-01  |
| R15: $\text{RCO}^* + \text{H}^{***} \rightarrow \text{RCOH}^* + ***$                                                                                                           | 1.20 | 0.84  | -3.27E-05 |
| R151: $\text{RCO}^{**} + \text{O}^* + \text{H}^{***} \rightarrow \text{RCOH}^{**} + \text{O}^* + ***$                                                                          | 0.97 | 0.17  | 2.72E-05  |
| R152: $\text{RCO}^* + \text{OH}^{**} + \text{H}^{***} \rightarrow \text{RCOH}^* + \text{OH}^{**} + ***$                                                                        | 1.08 | 0.70  | 3.02E-07  |
| R16: $\text{RCOH}^* + \text{H}^{***} \rightarrow \text{RCHOH}^* + ***$                                                                                                         | 0.88 | 0.41  | -3.25E-05 |
| R161: $\text{RCOH}^{**} + \text{O}^* + \text{H}^{***} \rightarrow \text{RCHOH}^{**} + \text{O}^* + ***$                                                                        | 0.48 | 0.44  | 2.72E-05  |
| R162: $\text{RCOH}^* + \text{OH}^{**} + \text{H}^{***} \rightarrow \text{RCHOH}^* + \text{OH}^{**} + ***$                                                                      | 0.65 | 0.09  | 7.39E-09  |
| R170: $\text{RCO}^{**} + \text{RCH}_2\text{O}^* \rightarrow \text{RCOOC}_2\text{H}_5(\text{g}) + * + **$                                                                       | 0.54 | -0.67 | 3.94E-02  |
| R17: $\text{RCO}^* + \text{RCH}_2\text{O}^{**} \rightarrow \text{RCOOC}_2\text{H}_5(\text{g}) + * + **$                                                                        | 0.78 | -0.43 | 1.04E-02  |
| R171: $\text{RCO}^{**} + \text{O}^* + \text{RCH}_2\text{O}^{****} \rightarrow \text{RCOOC}_2\text{H}_5(\text{g}) + \text{O}^* + ** + ****$                                     | 0.89 | -0.98 | 1.16E-07  |
| R172: $\text{RCH}_2\text{O}^{**} + \text{RCO}^* + \text{OH}^{**} \rightarrow \text{RCOOC}_2\text{H}_5(\text{g}) + \text{OH}^* + 2^{**}$                                        | 0.73 | -0.76 | 3.39E-08  |
| R180: $\text{RCHO}(\text{g}) + \text{RCH}_2\text{O}^* \rightarrow \text{RCHOOC}_2\text{H}_5^*$                                                                                 | 1.23 | 0.65  | -5.50E-03 |
| R181: $\text{RCHO}(\text{g}) + \text{RCH}_2\text{O}^{**} + \text{O}^* \rightarrow \text{RCHOOC}_2\text{H}_5^{**} + \text{O}^*$                                                 | 1.15 | 0.71  | -2.69E-06 |
| R182: $\text{RCHO}(\text{g}) + \text{RCH}_2\text{O}^{**} + \text{OH}^* \rightarrow \text{RCHOOC}_2\text{H}_5^{**} + \text{OH}^*$                                               | 1.49 | 0.87  | -2.56E-07 |
| R183: $\text{RCHOOC}_2\text{H}_5^{**} + \text{O}^* + **** \rightarrow \text{RCHOOC}_2\text{H}_5^{****} + \text{O}^* + **$                                                      | 0.09 | 0.09  | -2.69E-06 |
| R184: $\text{RCHOOC}_2\text{H}_5^{**} + \text{OH}^* + **** \rightarrow \text{RCHOOC}_2\text{H}_5^{****} + \text{OH}^* + **$                                                    | 0.31 | 0.31  | -2.47E-07 |
| R185: $\text{RCHOOC}_2\text{H}_5^{****} + * \rightarrow \text{RCHOOC}_2\text{H}_5^* + ****$                                                                                    | 0.00 | -0.67 | 5.62E-03  |
| R19: $\text{RCHOOC}_2\text{H}_5^* + *** \rightarrow \text{CH}_3\text{COOC}_2\text{H}_5(\text{g}) + * + \text{H}^{***}$                                                         | 0.50 | -0.97 | 1.25E-04  |
| R191: $\text{RCHOOC}_2\text{H}_5^{**} + \text{O}^* + *** \rightarrow \text{RCOOC}_2\text{H}_5(\text{g}) + \text{O}^* + ** + \text{H}^{***}$                                    | 0.37 | -1.37 | 8.73E-09  |
| R192: $\text{RCHOOC}_2\text{H}_5^{**} + \text{OH}^* + *** \rightarrow \text{RCOOC}_2\text{H}_5(\text{g}) + \text{OH}^* + ** + \text{H}^{***}$                                  | 0.80 | -1.31 | 3.59E-11  |
| R20: $2\text{OH}^* \rightarrow \text{H}_2\text{O}(\text{g}) + \text{O}^* + *$                                                                                                  | 0.60 | -0.27 | 2.61E-02  |
| R21: $\text{O}^* + \text{H}^{***} \rightarrow \text{OH}^* + ***$                                                                                                               | 0.96 | 0.29  | 2.20E+00  |
| R22: $\text{OH}^* + \text{H}^{***} \rightarrow \text{H}_2\text{O}(\text{g}) + * + ***$                                                                                         | 1.05 | 0.02  | 1.06E-02  |
| R23: $\text{RCOOH}(\text{g}) + * \rightarrow \text{RCOOH}^*$                                                                                                                   | 0.10 | 0.10  | 2.18E+00  |
| R24: $\text{H}_2(\text{g}) + 2^{***} \rightarrow 2\text{H}^{***}$                                                                                                              | 0.20 | -0.29 | -9.81E+00 |
| R01: $\text{RCOOH}^{****} + **** \rightarrow \text{RCOO}^{****} + \text{H}^{****}$                                                                                             | 0.47 | -0.33 | 0E+00     |
| R02: $\text{RCOOH}^{****} + \text{H}^{****} \rightarrow \text{RCHOOH}^{****} + ****$                                                                                           | 1.10 | 0.49  | 1.13E-01  |
| R03: $\text{RCHOOH}^{****} \rightarrow \text{RCHO}(\text{g}) + \text{OH}^{****}$                                                                                               | 0.52 | -0.55 | 1.13E-01  |
| R04: $\text{RCO}^{****} + \text{H}^{****} \rightarrow \text{RCHO}(\text{g}) + 2^{****}$                                                                                        | 0.50 | -0.87 | 1.44E-01  |
| R05: $\text{RCHO}(\text{g}) + \text{H}^{****} \rightarrow \text{RCH}_2\text{O}^{****}$                                                                                         | 1.19 | 0.32  | 2.45E+01  |
| R06: $\text{RCH}_2\text{O}^{****} + \text{H}^{****} \rightarrow \text{RCH}_2\text{OH}(\text{g}) + 2^{****}$                                                                    | 0.96 | -0.43 | 7.46E-01  |
| R07: $\text{RCO}^{****} + \text{RCH}_2\text{O}^{****} \rightarrow \text{RCOOC}_2\text{H}_5(\text{g}) + 2^{****}$                                                               | 0.67 | -1.49 | 5.04E-07  |
| R08: $\text{RCHO}(\text{g}) + \text{RCH}_2\text{O}^{****} \rightarrow \text{RCHOOC}_2\text{H}_5^{****}$                                                                        | 1.13 | 0.61  | 5.93E-03  |
| R09: $\text{RCHOOC}_2\text{H}_5^{****} \rightarrow \text{RCOOC}_2\text{H}_5(\text{g}) + \text{H}^{****}$                                                                       | 0.59 | -1.15 | 3.01E-04  |
| R010: $\text{OH}^{****} + \text{H}^{****} \rightarrow \text{H}_2\text{O}(\text{g}) + 2^{****}$                                                                                 | 0.91 | -0.59 | 2.26E+00  |
| R011: $\text{RCOOH}(\text{g}) + **** \rightarrow \text{RCOOH}^{****}$                                                                                                          | 0.42 | 0.42  | 1.13E-01  |
| R012: $\text{H}_2(\text{g}) + 2^{****} \rightarrow 2\text{H}^{****}$                                                                                                           | 0.80 | 0.07  | 1.39E+01  |
| $r_{\text{RCHO}} = r_8 + r_{81} + r_{82} - r_{10} - r_{101} - r_{102} + r_{003} + r_{004} - r_{005} - r_{008} - r_{11} - r_{111} - r_{112} - r_{180} -$<br>$r_{181} - r_{182}$ |      |       | 3.01E-01  |
| $r_{\text{RCH}_2\text{OH}} = r_{13} + r_{131} + r_{132} + r_{14} + r_{006} + r_{12} + r_{121} + r_{122}$                                                                       |      |       | 1.77E+00  |



$$r_{\text{RCOOC}_2\text{H}_5} = r_{170} + r_{17} + r_{171} + r_{172} + r_{007} + r_{009} + r_{19} + r_{191} + r_{192}$$

$$5.02\text{E-}02$$

**Table S4.** Coverage of surface species in HDO process of acetic acid on the NiCu (111) surface.

(R=CH<sub>3</sub>)

| Species                                | Coverage | Species                                            | Coverage | Species                                     | Coverage  |
|----------------------------------------|----------|----------------------------------------------------|----------|---------------------------------------------|-----------|
| $\theta_{\text{RCOOH}^*}$              | 2.18E-05 | $\theta_{\text{RCO}^{**}+\text{O}^*}$              | 1.54E-08 | $\theta_{\text{H}^{***}}$                   | 4.945E-02 |
| $\theta_{\text{RCOO}^*}$               | 5.80E-03 | $\theta_{\text{RCO}^{**}+\text{RCH}_2\text{O}^*}$  | 1.79E-10 | $\theta^{***}$                              | 5.466E-04 |
| $\theta_{\text{RCHOOH}^*}$             | 5.87E-10 | $\theta_{\text{OH}^{**}}$                          | 1.20E-06 | $\theta_{\text{RCOOH}^{****}}$              | 6.884E-05 |
| $\theta_{\text{RCO}^*}$                | 1.33E-03 | $\theta_{\text{RCH}_2\text{O}^{**}+\text{OH}^*}$   | 5.68E-10 | $\theta_{\text{RCOO}^{****}}$               | 2.248E-02 |
| $\theta_{\text{OH}^*}$                 | 3.08E-05 | $\theta_{\text{RCH}_2\text{O}^{**}+\text{O}^*}$    | 1.10E-08 | $\theta_{\text{RCHOOH}^{****}}$             | 3.977E-10 |
| $\theta_{\text{O}^*}$                  | 1.09E-03 | $\theta_{\text{RCH}_2\text{O}^{**}+\text{RCO}^*}$  | 5.99E-09 | $\theta_{\text{RCO}^{****}}$                | 7.948E-10 |
| $\theta_{\text{RCHOO}^*}$              | 3.83E-11 | $\theta_{\text{RCHOOC}_2\text{H}_5^*+\text{OH}^*}$ | 5.85E-15 | $\theta_{\text{OH}^{****}}$                 | 2.903E-05 |
| $\theta_{\text{RCH}_2\text{O}^*}$      | 1.60E-03 | $\theta_{\text{RCHOOC}_2\text{H}_5^*+\text{O}^*}$  | 2.46E-15 | $\theta_{\text{RCH}_2\text{O}^{**}}$        | 3.979E-05 |
| $\theta_{\text{RCHOOC}_2\text{H}_5^*}$ | 4.64E-10 | $\theta_{\text{RCHOH}^{**}+\text{O}^*}$            | 2.78E-11 | $\theta_{\text{H}^{****}}$                  | 6.328E-01 |
| $\theta_{\text{RCHOH}^*}$              | 1.86E-10 | $\theta_{\text{RCOH}^{**}+\text{O}^*}$             | 2.21E-09 | $\theta_{\text{RCHOOC}_2\text{H}_5^{****}}$ | 4.862E-12 |
| $\theta_{\text{RCOH}^*}$               | 1.95E-09 | $\theta^{**}$                                      | 2.00E-02 | $\theta^{****}$                             | 2.646E-01 |
| $\theta^*$                             | 1.31E-04 |                                                    |          |                                             |           |

**Table S5.** The barrier, reaction energies in Gibbs free energy and corresponding rates of every elementary reaction involved in the HDO process of acetic acid on Cu (111) surface. The X\* represented the adsorbed on the Cu site.

| Elementary Reaction                                                                                               | Ga (eV) | $\Delta G$ (eV) | Rates (s <sup>-1</sup> ) |
|-------------------------------------------------------------------------------------------------------------------|---------|-----------------|--------------------------|
| R1: RCOOH* + * $\rightarrow$ RCOO* + H*                                                                           | 0.47    | 0.80            | 1.82E-03                 |
| R2: RCOOH* + H* $\rightarrow$ RCHOOH* + *                                                                         | 1.10    | 0.61            | 1.34E-01                 |
| R3: RCOOH* + * $\rightarrow$ RCO* + OH*                                                                           | 1.46    | 0.65            | 4.09E-05                 |
| R4: RCOO* + * $\rightarrow$ RCO* + O*                                                                             | 1.96    | 0.30            | 5.53E-07                 |
| R5: RCOO* + H* $\rightarrow$ RCHOO* + *                                                                           | 1.60    | 0.48            | 1.82E-03                 |
| R6: RCHOOH* $\rightarrow$ RCHO (g) + OH*                                                                          | 0.52    | 1.12            | 1.34E-01                 |
| R7: RCHOOH* + * $\rightarrow$ RCHOO* + H*                                                                         | 1.10    | 0.80            | 5.39E-08                 |
| R8: RCO* + H* $\rightarrow$ RCHO (g) + 2*                                                                         | 0.50    | 1.42            | 4.10E-05                 |
| R9: RCHOO* $\rightarrow$ RCHO (g) + O*                                                                            | 0.38    | 0.76            | 1.82E-03                 |
| R10: RCHO (g) + H* $\rightarrow$ RCH <sub>2</sub> O*                                                              | 1.24    | 0.87            | 1.29E-01                 |
| R11: RCHO (g) + H* $\rightarrow$ RCHOH*                                                                           | 1.54    | 0.23            | 2.34E-03                 |
| R12: RCHOH* + H* $\rightarrow$ RCH <sub>2</sub> OH(g) + 2*                                                        | 0.09    | 1.50            | 2.34E-03                 |
| R13: RCH <sub>2</sub> O* + H* $\rightarrow$ RCH <sub>2</sub> OH (g) + 2*                                          | 0.96    | 1.45            | 1.31E-01                 |
| R14: RCH <sub>2</sub> O* + OH* $\rightarrow$ RCH <sub>2</sub> OH (g) + O* + *                                     | 0.64    | 0.58            | -2.22E-03                |
| R15: RCO* + H* $\rightarrow$ RCOH* + *                                                                            | 0.81    | 0.37            | 4.43E-07                 |
| R16: RCOH* + H* $\rightarrow$ RCHOH* + *                                                                          | 0.54    | 0.59            | 4.43E-07                 |
| R17: RCO* + RCH <sub>2</sub> O* $\rightarrow$ RCOOC <sub>2</sub> H <sub>5</sub> (g) + 2*                          | 0.67    | 2.16            | 1.45E-09                 |
| R18: RCHO (g) + RCH <sub>2</sub> O* $\rightarrow$ RCHOOC <sub>2</sub> H <sub>5</sub> *                            | 1.18    | 0.52            | 8.45E-06                 |
| R19: RCHOOC <sub>2</sub> H <sub>5</sub> * $\rightarrow$ CH <sub>3</sub> COOC <sub>2</sub> H <sub>5</sub> (g) + H* | 0.59    | 1.74            | 8.45E-06                 |
| R20: 2OH* $\rightarrow$ H <sub>2</sub> O (g) + O* + *                                                             | 0.32    | 0.44            | 4.23E-04                 |
| R21: O* + H* $\rightarrow$ OH* + *                                                                                | 0.91    | 1.43            | 2.89E-05                 |
| R22: OH* + H* $\rightarrow$ H <sub>2</sub> O (g) + 2*                                                             | 0.91    | 1.55            | 1.35E-01                 |
| R23: RCOOH (g) + * $\rightarrow$ RCOOH*                                                                           | 0.42    | 0.00            | 1.36E-01                 |
| R24: H <sub>2</sub> (g) + 2* $\rightarrow$ 2H*                                                                    | 0.80    | 0.73            | 2.67E-01                 |
| $r_{\text{RCHO}} = r6 + r8 + r9 - r10 - r11 - r18$                                                                |         |                 | 4.51E-03                 |
| $r_{\text{RCH}_2\text{OH}} = r11 + r12 + r13 + r14$                                                               |         |                 | 1.31E-01                 |
| $r_{\text{RCOOC}_2\text{H}_5} = r17 + r19$                                                                        |         |                 | 8.46E-06                 |

To corroborate the conclusion from DFT results and gain more quantitative activities of HDO process of acetic acid, the micro-kinetic analysis was used in this paper. The rate equation of every elementary step was summarized in Table S2. Simply, the rate constant  $k_i$ ( $k_{i}$ ) of the step  $i$  was calculated based on the transition state theory (TST):

$$k = \frac{k_b T}{h} e^{-\frac{\Delta G}{k_b T}}$$

where the  $h$ ,  $k_b$  and  $T$  was the Planck constant, Boltzmann constant and chosen temperature. The  $\Delta G$  was the standard molar Gibbs free energy change between the IS (FS) and TS. The Gibbs free energies of all gaseous species ( $\text{CH}_3\text{COOH}$ ,  $\text{CH}_3\text{CHO}$ ,  $\text{C}_2\text{H}_5\text{OH}$ ,  $\text{CH}_3\text{COOC}_2\text{H}_5$ ,  $\text{H}_2$  and  $\text{H}_2\text{O}$ ) was obtained by the following equation:

$$G(T, p) = E_{\text{tot}} + \text{ZPE} + \Delta G(0 \rightarrow T, p) = E_{\text{tot}} + \text{ZPE} + \Delta G(0 \rightarrow T, P^0) - RT \ln(P/P^0)$$

where the  $E_{\text{tot}}$ ,  $\text{ZPE}$ ,  $\Delta G(0 \rightarrow T, P^0)$  represented the DFT energies, zero point energies, the free energies change from the 0 K and standard to the current temperature  $T$  and partial pressure  $P$ . Both of the  $\text{ZPE}$  and  $\Delta G(0 \rightarrow T, p)$  could be obtained based on frequency calculation and the details could be found in VASPKIT code. In addition, the Gibbs free energies of adsorbates was calculated by:

$$G(T) = E_{\text{tot}} + \text{ZPE} + \Delta G(0 \rightarrow T)$$

where the  $E_{\text{tot}}$ ,  $\text{ZPE}$ ,  $\Delta G(0 \rightarrow T)$  represented the DFT energies, zero point energies, the thermal correction. The  $\text{ZPE}$  and required thermal correction could be obtained with the help of the vibrational frequency. As shown in the next two equations:

$$\text{ZPE} = \sum_i \left( \frac{v_i h}{2} \right)$$

$$\Delta G_i(0 \rightarrow T) = \sum_i \left( -k_b T \ln \frac{1}{1 - \exp\left(-\frac{v_i h}{k_b T}\right)} \right)$$

where the  $v_i$ ,  $h$ ,  $k_b$  and  $T$  was the frequency, Planck constant, Boltzmann constant and temperature.

The reaction conditions was set as  $T=573$  K,  $p=2.5$  MPa,  $\text{H}_2/\text{CH}_3\text{COOH} = 20$  and which was used in the experimental evaluations. The conversion of acetic acid was set to be 70%. The steady-state

approximation was applied here to treat the micro-kinetic model where the coverage of the adsorbates was assumed unchanged ( $dX/dt \approx 0$ , X = adsorbates) in the steady state, leading to a set of equations as shown below:

**Table S6.** The steady-state equations of the each species X involved in the HDO process of acetic acid

| X species : $dX/dt = 0$                                                                                                                                                                                                                                                                                             |
|---------------------------------------------------------------------------------------------------------------------------------------------------------------------------------------------------------------------------------------------------------------------------------------------------------------------|
| $X = \text{RCOOH}^*$ : $r_1 + r_2 + r_3 - r_{23} = 0$                                                                                                                                                                                                                                                               |
| $X = \text{RCOO}^*$ : $r_1 - r_4 - r_5 = 0$                                                                                                                                                                                                                                                                         |
| $X = \text{RCHOOH}^*$ : $r_2 - r_6 - r_7 = 0$                                                                                                                                                                                                                                                                       |
| $X = \text{RCO}^*$ : $r_3 + r_{42} - r_8 - r_{82} - r_{106} - r_{108} = 0$                                                                                                                                                                                                                                          |
| $X = \text{OH}^*$ : $r_{32} + r_{82} + r_6 - r_{102} + r_{104} + r_{132} + r_{172} + r_{184} + r_{192} - 2^*r_{20} + r_{21} - r_{22} = 0$                                                                                                                                                                           |
| $X = \text{O}^*$ : $r_{41} + r_{81} + r_9 - r_{101} + r_{103} - r_{111} + r_{121} + r_{131} + r_{14} + r_{171} + r_{183} + r_{191} + r_{20} - r_{21} = 0$                                                                                                                                                           |
| $X = \text{RCHOO}^*$ : $r_5 + r_7 - r_9 = 0$                                                                                                                                                                                                                                                                        |
| $X = \text{RCH}_2\text{O}^*$ : $r_{10} + r_{105} - r_{107} - r_{13} = 0$                                                                                                                                                                                                                                            |
| $X = \text{RCHOH}^*$ : $r_{11} + r_{112} - r_{12} - r_{122} + r_{16} + r_{162} = 0$                                                                                                                                                                                                                                 |
| $X = \text{RCOH}^*$ : $r_{15} + r_{152} - r_{16} - r_{162} = 0$                                                                                                                                                                                                                                                     |
| $X = \text{RCHOOC}_2\text{H}_5^*$ : $r_{180} + r_{185} - r_{19} = 0$                                                                                                                                                                                                                                                |
| $X = \text{RCO}^{**} + \text{O}^*$ : $r_4 - r_{41} - r_{81} - r_{151} - r_{171} = 0$                                                                                                                                                                                                                                |
| $X = \text{RCO}^{**} + \text{C}_2\text{H}_5\text{O}^*$ : $r_{107} - r_{170} = 0$                                                                                                                                                                                                                                    |
| $X = \text{OH}^{**}$ : $r_3 - r_{31} - r_{82} - r_{172} = 0$                                                                                                                                                                                                                                                        |
| $X = \text{CH}_2\text{O}^{**} + \text{OH}^*$ : $r_{102} - r_{104} - r_{14} - r_{132} - r_{182} = 0$                                                                                                                                                                                                                 |
| $X = \text{RCH}_2\text{O}^{**} + \text{O}^*$ : $r_{101} - r_{103} - r_{131} - r_{181} = 0$                                                                                                                                                                                                                          |
| $X = \text{RCH}_2\text{O}^{**} + \text{RCO}^*$ : $r_{106} + r_{108} - r_{17} - r_{172} = 0$                                                                                                                                                                                                                         |
| $X = \text{RCHOH}^{**} + \text{O}^*$ : $r_{111} - r_{121} + r_{161} = 0$                                                                                                                                                                                                                                            |
| $X = \text{RCOH}^{**} + \text{O}^*$ : $r_{151} - r_{161} = 0$                                                                                                                                                                                                                                                       |
| $X = \text{RCHOOC}_2\text{H}_5^{**} + \text{OH}^*$ : $r_{182} - r_{184} - r_{192} = 0$                                                                                                                                                                                                                              |
| $X = \text{RCHOOC}_2\text{H}_5^{**} + \text{O}^*$ : $r_{181} - r_{183} - r_{191} = 0$                                                                                                                                                                                                                               |
| $X = \text{H}^{***}$ : $r_1 - r_2 - r_5 + r_7 - r_8 - r_{81} - r_{82} - r_{10} - r_{101} - r_{102} - r_{11} - r_{111} - r_{112} - r_{12} - r_{121} - r_{122} - r_{13} - r_{131} - r_{132} - r_{15} - r_{151} - r_{152} - r_{16} - r_{161} - r_{162} + r_{19} + r_{191} + r_{192} - r_{21} - r_{22} + 2^*r_{24} = 0$ |
| $X = \text{RCOOH}^{****}$ : $-r_{01} - r_{02} + r_{011} = 0$                                                                                                                                                                                                                                                        |
| $X = \text{RCOO}^{****}$ : $r_{01} = 0$                                                                                                                                                                                                                                                                             |
| $X = \text{RCHOOH}^{****}$ : $r_{02} - r_{03} = 0$                                                                                                                                                                                                                                                                  |
| $X = \text{RCO}^{****}$ : $r_{41} - r_{42} - r_{81} - r_{107} - r_{04} - r_{07} = 0$                                                                                                                                                                                                                                |
| $X = \text{OH}^{****}$ : $r_{31} - r_{32} + r_{03} - r_{010} = 0$                                                                                                                                                                                                                                                   |
| $X = \text{RCH}_2\text{O}^{****}$ : $r_{103} + r_{104} - r_{105} - r_{106} - r_{108} - r_{181} + r_{05} - r_{06} - r_{07} - r_{08} = 0$                                                                                                                                                                             |
| $X = \text{H}^{****}$ : $r_{01} - r_{02} - r_{04} - r_{05} - r_{06} + r_{09} - r_{010} + 2^*r_{012} = 0$                                                                                                                                                                                                            |
| $X = \text{RCHOOC}_2\text{H}_5^{****}$ : $r_{183} + r_{184} - r_{185} + r_{08} - r_{09} = 0$                                                                                                                                                                                                                        |

There were 4 kinds of sites in the current system. \*, \*\*, \*\*\* and \*\*\*\* represented that the most stable site (Ni<sup>3</sup> site), the secondary stable site (usually Ni<sup>2</sup> site), the site for the adsorbed hydrogen atoms on the nickel and the monometallic Cu site, respectively. The Ni<sup>3</sup> site was assumed to occupy 1% of surface sites which was low enough to match the experimental preparations. In addition, the normalization equations of 4 kinds of sites should be satisfied by eq S6-S9:

$$\begin{aligned} &\theta_{\text{RCOOH}^*} + \theta_{\text{RCOO}^*} + \theta_{\text{RCHOOH}^*} + \theta_{\text{RCO}^*} + \theta_{\text{RCO}^{**}+\text{O}^*} + \theta_{\text{RCO}^{**}+\text{RCH}_2\text{O}^*} + \theta_{\text{OH}^*} + \theta_{\text{O}^{**}} + \theta_{\text{RCHOO}^{**}} + \theta_{\text{RCH}_2\text{O}^{**}} \\ &+ \theta_{\text{RCHOH}^{**}} + \theta_{\text{RCOH}^{**}} + \theta_{\text{RCHOOC}_2\text{H}_5^*} + \theta_{\text{RCH}_2\text{O}^{**}+\text{OH}^*} + \theta_{\text{RCH}_2\text{O}^{**}+\text{O}^*} + \theta_{\text{RCH}_2\text{O}^{**}+\text{RCO}^*} + \theta_{\text{RCHOH}^{**}+\text{O}^*} + \\ &\theta_{\text{RCOH}^{**}+\text{O}^*} + \theta_{\text{RCHOOC}_2\text{H}_5^*+\text{OH}^*} + \theta_{\text{RCHOOC}_2\text{H}_5^*+\text{O}^*} + \theta_* = 0.01 \end{aligned} \quad \text{S6}$$

$$\begin{aligned} &\theta_{\text{RCO}^{**}+\text{O}^*} + \theta_{\text{RCO}^{**}+\text{RCH}_2\text{O}^*} + \theta_{\text{OH}^{**}} + \theta_{\text{RCH}_2\text{O}^{**}+\text{OH}^*} + \theta_{\text{RCH}_2\text{O}^{**}+\text{O}^*} + \theta_{\text{RCH}_2\text{O}^{**}+\text{RCO}^*} + \theta_{\text{RCHOOC}_2\text{H}_5^*+\text{OH}^*} + \\ &\theta_{\text{RCHOOC}_2\text{H}_5^*+\text{O}^*} + \theta_{**} = 0.02 \end{aligned} \quad \text{S7}$$

$$\theta_{\text{H}^{***}} + \theta_{***} = 0.05 \quad \text{S8}$$

$$\begin{aligned} &\theta_{\text{RCOOH}^{****}} + \theta_{\text{RCOO}^{****}} + \theta_{\text{RCHOOH}^{****}} + \theta_{\text{RCO}^{****}} + \theta_{\text{OH}^{****}} + \theta_{\text{RCH}_2\text{O}^{**}} + \theta_{\text{H}^{****}} + \theta_{\text{RCHOOC}_2\text{H}_5^{****}} + \theta_{****} \\ &= 0.92 \end{aligned} \quad \text{S9}$$

Note that the secondary stable (Ni<sup>2</sup>) site was considered independent during the adsorption and reaction which could accommodate carbonaceous (C<sub>x</sub>H<sub>y</sub>O<sub>z</sub>) species only if the neighboring Ni<sup>3</sup> site had been occupied by the other species. Taking the co-adsorbed CH<sub>3</sub>CO<sup>\*\*</sup> and O<sup>\*</sup> species as an example, the two species was taken as a whole instead of the sum of individual acetyl and oxygen species. The (CH<sub>3</sub>CO<sup>\*\*</sup> + O<sup>\*</sup>) occupied the Ni<sup>2</sup> and Ni<sup>3</sup> sites simultaneously and existed on the two normalization equations (θ<sub>RCO<sup>\*\*</sup>+O<sup>\*</sup></sub> in the eq S6 and S9). Other dual species such as RCH<sub>2</sub>O<sup>\*\*</sup>+OH<sup>\*</sup> and RCH<sub>2</sub>O<sup>\*\*</sup>+O<sup>\*</sup> species were treated as similar methods. Due to the complexity of the reaction network (70 elementary reactions in total), some simplification was performed to enable the HDO process more understandable through omitting some unnecessary steps. The deleted reactions should exhibited relatively low reaction rates and degree of rate control (X<sub>RC</sub>) and the production rates of the products should be almost unchanged after the simplification. Finally, the reactions

reduced from 70 to 37 with the  $\text{CH}_3\text{COH}$ -,  $\text{CH}_3\text{CHOH}$ - and  $\text{CH}_3\text{CHOOC}_2\text{H}_5$ -assistant steps omitted and the activity surged by less than 2%, meaning that  $\text{CH}_3\text{COH}$ ,  $\text{CH}_3\text{CHOH}$  and  $\text{CH}_3\text{CHOOC}_2\text{H}_5$  had little contribution to the generation of ethanol and ethyl acetate, in accordance with the experimental results.
